# Supplementary material for: Effect of delayed cell infusion in patients with large B-cell lymphoma treated with chimeric antigen receptor T-cell therapy
Source: PubMed Central journal article supplement — Haematologica. 2023 Nov 30;109(5):1460–8. doi: 10.3324/haematol.2023.284453 (PMC11063866; doi:10.3324/haematol.2023.284453), 2023-11-30
Supplement: 2023_284453_JALLOUK_SUPPL.pdf [file 2023_284453_JALLOUK_SUPPL.pdf]

# Effect of delayed cell infusion in patients with large B-cell lymphoma treated with chimeric antigen receptor T-cell therapy

Andrew P. Jallouk,<sup>1,2</sup> Naishu Kui,<sup>3</sup> Ryan Sun,<sup>3</sup> Jason R. Westin,<sup>1</sup> Raphael E. Steiner,<sup>1</sup> Ranjit Nair,<sup>1</sup> Loretta J. Nastoupil,<sup>1</sup> Luis E. Fayad,<sup>1</sup> Ajlan Al Zaki,<sup>1</sup> Misha Hawkins,<sup>1</sup> Sherry Adkins,<sup>1</sup> Mansoor Noorani,<sup>1</sup> Kaberi Das,<sup>4</sup> Jared Henderson,<sup>1</sup> Elizabeth J. Shpall,<sup>5</sup> Partow Kebriaei,<sup>5</sup> Jeremy Ramdial,<sup>5</sup> Christopher R. Flowers,<sup>1</sup> Sattva S. Neelapu,<sup>1</sup> Sairah Ahmed<sup>1,5#</sup> and Paolo Strati<sup>1#</sup>

<sup>1</sup>Department of Lymphoma and Myeloma, the University of Texas MD Anderson Cancer Center, Houston, TX; <sup>2</sup>Division of Hematology/Oncology, Vanderbilt University Medical Center, Nashville, TN; <sup>3</sup>Department of Biostatistics, the University of Texas MD Anderson Cancer Center, Houston, TX; <sup>4</sup>Department of Leukemia, the University of Texas MD Anderson Cancer Center, Houston, TX and <sup>5</sup>Department of Stem Cell Transplantation and Cellular Therapy, the University of Texas MD Anderson Cancer Center, Houston, TX, USA

*#SA and PS contributed equally as senior authors.*

**Correspondence:** S. Ahmed  
[SAhmed3@mdanderson.org](mailto:SAhmed3@mdanderson.org)

P. Strati  
[pstrati@mdanderson.org](mailto:pstrati@mdanderson.org)

**Received:** October 12, 2023.  
**Accepted:** November 23, 2023.  
**Early view:** November 30, 2023.

<https://doi.org/10.3324/haematol.2023.284453>

©2024 Ferrata Storti Foundation

Published under a CC BY-NC license

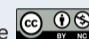

| <b>Cause of death</b>          | <b>On-time Cell Infusion<br/>(N=89)</b> | <b>Delayed Cell infusion<br/>(N=24)</b> |
|--------------------------------|-----------------------------------------|-----------------------------------------|
|                                | <b>Number (%)</b>                       |                                         |
| Disease recurrence/progression | 68 (76)                                 | 14 (59)                                 |
| Infection                      | 9 (10)                                  | 1 (4)                                   |
| Secondary malignancy           | 4 (4)                                   | 2 (8)                                   |
| ICANS                          | 4 (4)                                   | 0 (0)                                   |
| Intracranial hemorrhage        | 0 (0)                                   | 1 (4)                                   |
| Cardiac arrest                 | 1 (1)                                   | 0 (0)                                   |
| Interstitial pneumonia         | 1(1)                                    | 0 (0)                                   |
| Unknown                        | 2 (2)                                   | 5 (21)                                  |

**Supp. Table 1. Cause of death in deceased patients**

ICANS, immune effector cell-associated neurotoxicity syndrome

| Total (N=22)                        | 1 Day Delay<br>(N=18)      | 2-5 Day Delay<br>(N=11) | >5 Day Delay<br>(N=11) | P Value      |
|-------------------------------------|----------------------------|-------------------------|------------------------|--------------|
|                                     | Number (%), median [range] |                         |                        |              |
| Age (years)                         | 57 [24-69]                 | 61 [24-85]              | 66 [39-73]             | 0.350        |
| Male                                | 14 (77.8)                  | 5 (45.5)                | 7 (63.6)               | 0.255        |
| ECOG 2-4                            | 5 (27.8)                   | 2 (18.2)                | 1 (9.1)                | 0.543        |
| IPI score 3-5                       | 12 (66.7)                  | 8 (72.7)                | 7 (63.6)               | 0.999        |
| LDH (U/L) > UNL                     | 14 (77.8)                  | 10 (90.9)               | 7 (63.6)               | 0.399        |
| ANC < 1200/ $\mu$ L*                | 2 (11.1)                   | 3 (27.3)                | 7 (63.6)               | <b>0.010</b> |
| Plts < 75K / $\mu$ L*               | 8 (44.4)                   | 3 (27.3)                | 6 (54.5)               | 0.431        |
| Hgb < 9.0 g/dL*                     | 9 (50)                     | 4 (36.4)                | 8 (72.7)               | 0.246        |
| CRP > 3.0 mg/dL*                    | 12 (66.7)                  | 6 (54.5)                | 8 (72.7)               | 0.764        |
| Ferritin > 2,000 ng/mL*             | 5 (27.8)                   | 2 (18.2)                | 3 (27.3)               | 0.902        |
| CrCl (mL/min)                       | 68 [25-141]                | 92 [78-132]             | 92 [36-135]            | 0.207        |
| LDC dose reduced                    | 4 (22.2)                   | 2 (18.2)                | 1 (9.1)                | 0.868        |
| Total Flu dose (mg/m <sup>2</sup> ) | 90 [45-90]                 | 90 [60-90]              | 90 [60-90]             | 0.696        |
| Total Cy dose (mg/m <sup>2</sup> )  | 1500 [1000-1500]           | 1500 [1000-1500]        | 1500 [1000-1500]       | 0.917        |
| Prior therapies $\geq$ 3            | 16 (88.9)                  | 9 (81.8)                | 11 (100)               | 0.559        |
| Bridging therapy use                | 9 (50)                     | 7 (63.6)                | 5 (45.5)               | 0.779        |
| Refractory disease                  | 13 (72.2)                  | 8 (72.7)                | 9 (81.8)               | 0.902        |
| Previous autologous SCT             | 8 (44.4)                   | 0 (0)                   | 3 (27.3)               | <b>0.027</b> |
| Previous allogeneic SCT             | 0 (0)                      | 1 (9.1)                 | 1 (9.1)                | 0.492        |

**Supp. Table 2. Baseline characteristics of patients with 1 day delay, 2-5 day delay and >5 day delay**

ECOG, European Cooperative Oncology Group; IPI, International Prognostic Index; LDH,

lactate dehydrogenase; UNL, upper limit of normal; ANC, absolute neutrophil count; Plts, platelets; Hgb, hemoglobin; CRP, C-reactive protein; CrCl, creatinine clearance; LDC, lymphodepleting chemotherapy; Flu, fludarabine; Cy, cyclophosphamide; SCT, stem cell transplant

\* Cutoff values derived from CAR-HEMATOTOX score<sup>22</sup>

| Cause of delay                      | 1 Day Delay<br>(N=18) | 2-5 Day Delay<br>(N=11) | >5 Day Delay<br>(N=11) |
|-------------------------------------|-----------------------|-------------------------|------------------------|
|                                     | Number (%)            |                         |                        |
| Concern for infection               | 14 (77.7)             | 9 (81.8)                | 11 (100)               |
| Need for disease-related procedures | 1 (5.6)               | 2 (18.2)                | 0 (0)                  |
| Logistical delays                   | 3 (16.7)              | 0 (0)                   | 0 (0)                  |

**Supp. Table 3. Cause of infusion delay in patients with 1 day delay, 2-5 day delay and >5 day delay**
